# Supplementary material
Source: MDPI journal article supplement (https://www.mdpi.com/2077-1444/8/5/73)
Supplement: s1 [file s1]

## Method and Material Used for this Study

### Opinions of Orthodox Young People About Sex Orthodox Church of Kenya Youth Conference, Serem, Nandi County, Kenya 18–21 August 2016

1. You are (check one) \_\_\_\_\_ Male, or \_\_\_\_\_ Female.
2. You first learned about sex from (choose one and check):
  - \_\_\_\_ (a) my mother
  - \_\_\_\_ (b) my father
  - \_\_\_\_ (c) my brother
  - \_\_\_\_ (d) my sister
  - \_\_\_\_ (e) another relative
  - \_\_\_\_ (f) my friend/s
  - \_\_\_\_ (g) movies or TV
  - \_\_\_\_ (h) the internet
  - \_\_\_\_ (i) other
3. Where do you go for information about sex today? (Choose one or more and check)
  - \_\_\_\_ (a) my mother
  - \_\_\_\_ (b) my father
  - \_\_\_\_ (c) my brother
  - \_\_\_\_ (d) my sister
  - \_\_\_\_ (e) another relative
  - \_\_\_\_ (f) my friend/s
  - \_\_\_\_ (g) movies or TV
  - \_\_\_\_ (h) the internet
  - \_\_\_\_ (i) other
4. Do you agree or disagree with the following statements:
  - \_\_\_\_\_ A man and a woman should wait until they are married before they begin a sexual relationship.
  - \_\_\_\_\_ It's ok if a man and a woman want to have a sexual relationship before they are married.
5. Your attitudes towards sex are influenced most by: (choose one and check)
  - \_\_\_\_ What I hear on the radio or watch on TV
  - \_\_\_\_ What I see or read on the internet
  - \_\_\_\_ What I read in books
  - \_\_\_\_ What my friends say
  - \_\_\_\_ What the Church teaches
  - \_\_\_\_ What my parents say
6. When it comes to Christianity and the Church and their message about sex and relationships (choose one)
  - \_\_\_\_ My local Church is very clear in its teaching on sex and very supportive and helpful to me as a young person and the issues I have.
  - \_\_\_\_ My local Church is very clear in its teaching about sex and relationships, but is not very supportive and helpful to me as a young person and the issues I have.
  - \_\_\_\_ My local Church is not very clear in its teaching about sex and relationships and is not very supportive and helpful to me as a young person and the questions I have.
  - \_\_\_\_ My local Church pretends that sex doesn't exist.

7. Physical violence between a man and a woman is: (choose one)

- ☐ Ok. No problem.
- ☐ Sometimes it's all right, sometimes it's wrong, depending on the situation.
- ☐ Never right, always wrong.

8. HIV-Aids (choose one)

- ☐ has influenced by attitude and behavior when it comes to sex.
- ☐ is something I think about from time to time.
- ☐ is something I never think about

9. (For Boys) If I got a girl pregnant, I would:

- ☐ Encourage her to carry our baby to term and take steps to marry her.
- ☐ Encourage her to carry our baby to term but not marry her but take steps to support her and the child.
- ☐ Break off my relationship with her.
- ☐ Encourage her to get an abortion and continue to have relationships with girls.

10. (For Girls) If a boy got me pregnant, I would:

- ☐ Want to have my baby and marry the boy.
- ☐ Want to have my baby but not marry the boy, and instead stay at home.
- ☐ Get an abortion and continue to have relationships with boys.
