# Supplementary material
Source: MDPI journal article supplement (https://www.mdpi.com/2077-1444/8/5/73)
Supplement: s2 [file s2]

**Method and Material Used for this Study**

**Opinions of Orthodox Young People About Sex Orthodox Church of Kenya Youth Conference, Serem, Nandi County, Kenya 18–21 August 2016**

1. You are (check one) __________Male, or ____________Female.

2. You first learned about sex from (choose one and check):

____ (a) my mother

____ (b) my father

____ (c) my brother

____ (d) my sister

____ (e) another relative

____ (f) my friend/s

____ (g) movies or TV

____ (h) the internet

____ (i) other

3. Where do you go for information about sex today? (Choose one or more and check)

____ (a) my mother

____ (b) my father

____ (c) my brother

____ (d) my sister

____ (e) another relative

____ (f) my friend/s

____ (g) movies or TV

____ (h) the internet

____ (i) other

4. Do you agree or disagree with the following statements:

_______ A man and a woman should wait until they are married before they begin a sexual relationship.

_______ It’s ok if a man and a woman want to have a sexual relationship before they are married.

5. Your attitudes towards sex are influenced most by: (choose one and check)

____ What I hear on the radio or watch on TV

____ What I see or read on the internet

____ What I read in books

____ What my friends say

____ What the Church teaches

____ What my parents say

6. When it comes to Christianity and the Church and their message about sex and relationships (choose one)

____ My local Church is very clear in its teaching on sex and very supportive and helpful to me as a young person and the issues I have.

____ My local Church is very clear in its teaching about sex and relationships, but is not very supportive and helpful to me as a young person and the issues I have.

____ My local Church is not very clear in its teaching about sex and relationships and is not very supportive and helpful to me as a young person and the questions I have.

____ My local Church pretends that sex doesn’t exist.

7. Physical violence between a man and a woman is: (choose one)

____ Ok. No problem.

____ Sometimes it’s all right, sometimes it’s wrong, depending on the situation.

____ Never right, always wrong.

8. HIV-Aids (choose one)

____ has influenced by attitude and behavior when it comes to sex.

____ is something I think about from time to time.

____ is something I never think about

9. (For Boys) If I got a girl pregnant, I would:

____ Encourage her to carry our baby to term and take steps to marry her.

____ Encourage her to carry our baby to term but not marry her but take steps to support her and the child.

____ Break off my relationship with her.

____ Encourage her to get an abortion and continue to have relationships with girls.

10. (For Girls) If a boy got me pregnant, I would:

____ Want to have my baby and marry the boy.

____ Want to have my baby but not marry the boy, and instead stay at home.

____ Get an abortion and continue to have relationships with boys.
